# Supplementary material for: Synthesis of two-dimensional bismuth molybdenum oxide (2D-BMO) nanosheets and their application as fluorescent probes for the detection of explosive nitroaromatic compounds
Source: Royal Society of Chemistry journal article supplement (doi:10.1039/d4en00517a), 2024-10-09
Supplement: d4en00517a1.pdf [file d4en00517a1.pdf]

Supporting information

**Synthesis of Two-dimensional Bismuth Molybdenum Oxide (2D-BMO) nanosheets and their application as fluorescence probes for the detection of explosive nitroaromatic compound**

Shams Ur Rehman<sup>1</sup>, Sivakumar Musuvadhi Babulal<sup>1</sup>, Muhammad Mustafa<sup>1</sup>, Hui-Fen Wu\*<sup>1, 2, 3,4,5,6</sup>

<sup>1</sup>Department of Chemistry, National Sun Yat-Sen University, Kaohsiung, 70, Lien-Hai Road, Kaohsiung, 80424, Taiwan

<sup>2</sup>School of Pharmacy, College of Pharmacy, Kaohsiung Medical University, Kaohsiung, 807, Taiwan

<sup>3</sup>Institute of Medical Science and Technology, National Sun Yat-Sen University, Kaohsiung, 80424, Taiwan

<sup>4</sup>School of Medicine, College of Medicine, National Sun Yat-Sen University, Kaohsiung, 80424, Taiwan

<sup>5</sup>Institute of Precision Medicine, National Sun Yat-Sen University, Kaohsiung, 80424, Taiwan

<sup>6</sup>Institute of BioPharmaceutical Sciences, National Sun Yat-Sen University, 80424, Taiwan

\*Corresponding author, Phone: +886-7-5252000-3955; Fax: +886-7-5253909

Email: [hwu@faculty.nsysu.edu.tw](mailto:hwu@faculty.nsysu.edu.tw) (Prof H.-F. Wu)

---

### 2.3. Instruments

The optical properties of the nanomaterials were assessed using an Evolution 201 UV-Vis spectrometer (Thermo SCIENTIFIC, USA). The morphology and structural characteristics were analyzed with a JEOL 3010 AEM High-resolution transmission electron microscope (HRTEM) and selected area electron diffraction (SAED) (JEOL, Japan). The crystallinity of the nanosheets was further investigated through X-ray diffraction (XRD, Bruker D8 Advance, Philips, Netherlands). X-ray photoelectron spectroscopy (XPS) was conducted to determine the chemical composition and oxygen vacancies, utilizing Auger electron spectroscopy with a field emission gun (JEOL, Japan). Atomic Force Microscopy (AFM) characterization was done by Seiko, Model: HV-300. The surface area and pore size of the nanosheets were measured using the Brunauer-Emmett-Teller (BET) method.

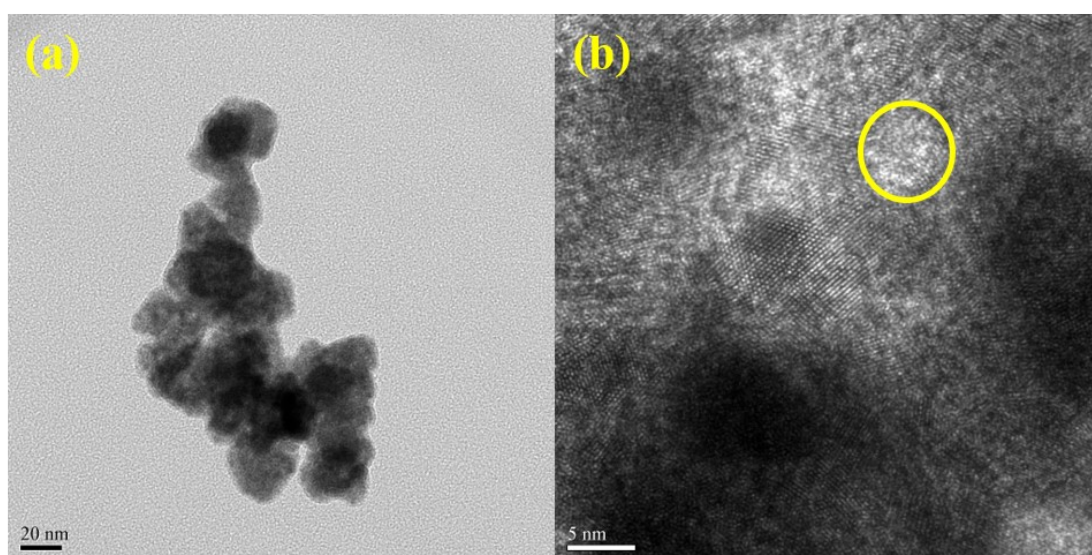

**Fig. S1** (a) TEM and (b) HRTEM images of the 2D-BMO nanosheets

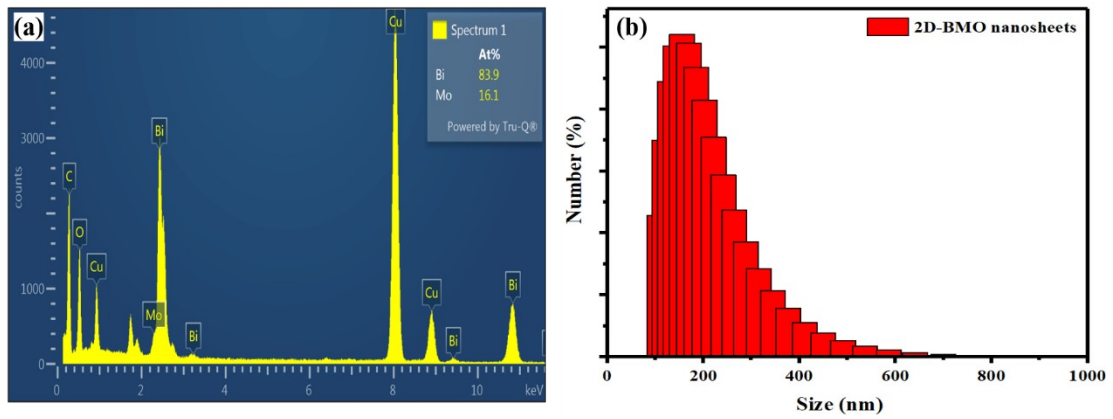

**Fig. S2** (a) EDS spectra and (b) DLS to detect the size of the 2D-BMO nanosheets.

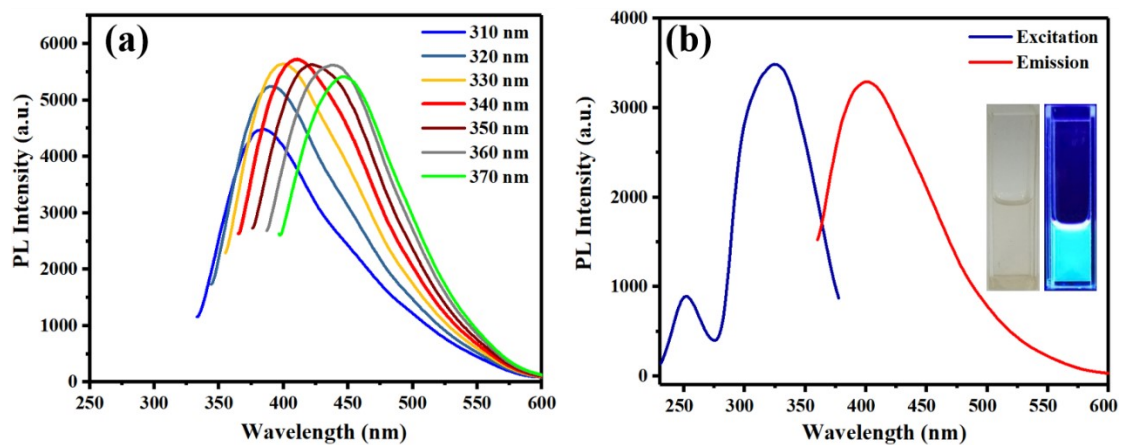

**Fig. S3** (a) Emission spectra of the 2D-BMO nanosheets against excitation (310-370 nm), (b) excitation and emission spectra of the 2D-BMO nanosheets

### S1. Quantum yield equation and calculation

The quantum yield of the synthesized material was calculated using the equation as below:

$$\varphi_{\text{ZnO}_{2\text{D-BMO}}} = \varphi_{\text{Q.S.}} \times \frac{F(\text{AUC})_{2\text{D-BMO}}}{F(\text{AUC})_{\text{Q.S.}}} \times \frac{\text{Absorbance}_{\text{Q.S.}}}{\text{Absorbance}_{2\text{D-BMO}}} \times \frac{\eta_{2\text{D-BMO}}}{\eta_{\text{Q.S.}}}$$

where  $\varphi$  is Quantum yield, Q.S. = Quinine sulfate (reference), F (AUC) = Fluorescence Area under the curve, Absorbance = Absorbance at 370 nm,  $\eta$  = Solvent refractive index of the sample (water: 1.333).

The quantum yield of 2D-BMO was calculated using the values as:

$\varphi_{Q,S} = 54.6\%$ ,  $F(AUC)_{2D-BMO} = 10866.9$ ,  $F(AUC)_{Q,S} = 60,260.0$ ,  $Absorbance_{Q,S} = 2.9$ ,  $Absorbance_{2D-BMO} = 0.7$ ,  $\eta_{2D-BMO} = 1.4$ , and  $\eta_{Q,S} = 1.3$  (water as a solvent)

## S2. Quenching efficiency equation

The quenching efficiency (QE) of ferritin and all other interfering biomolecules was calculated using the equation below:

$$QE = \frac{(I_0 - I)}{I_0} \times 100$$

Where  $I_0$  and  $I$  are the fluorescence intensities of 2D-BMO nanosheets without and with analyte, respectively.

## S3. LOD calculations

The LOD values for PA and 2,4-DNPH were calculated by the following formulas.

$$LOD = 3.3 * SD / S$$

$$SD = \text{Intercept} / 1000^1$$

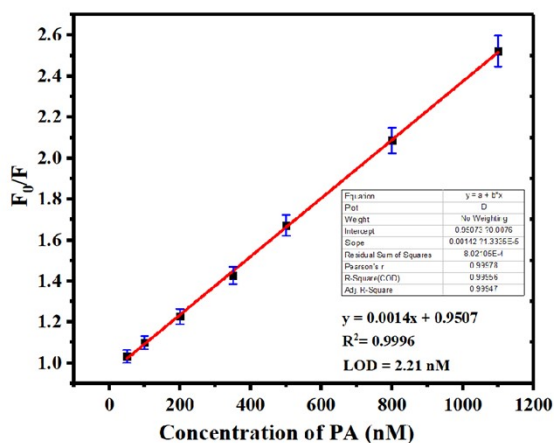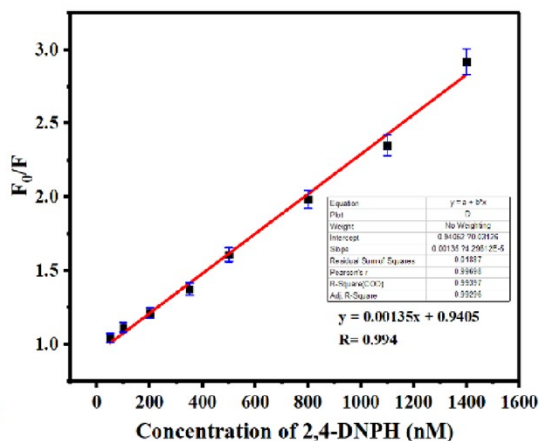

### Calculation for PA:

Slope = 0.00142

Intercept = 0.951

$SD = 0.950 / 1000 = 0.00095$

$LOD = 3.3 * 0.000951 / 0.00142 = 2.21 \text{ nM}$

### Calculation for 2,4-DNPH:

Slope = 0.00135

Intercept = 0.9405

SD = 0.9405/1000 = 0.0009405

LOD =  $3.3 \times 0.000941 / 0.00135 = 2.30$  nM

#### **S.4 Quenching constant ( $K_{sv}$ ) calculation**

Stern-Volmer equation:

$$F_0/F = 1 + K_{sv} [Q]$$

$F_0$  and  $F$  indicate the fluorescence intensities before and after introducing the quencher, respectively,  $K_{sv}$  is the quenching constant, and  $[Q]$  indicates the quencher concentration<sup>2,3</sup>.

#### **Quenching constant for PA ( $K_{sv_{PA}}$ )**

The calculated Stern-Volmer equation for the PA given above is:

$$y = 0.0014x + 0.950$$

so the calculated  $K_{sv_{PA}}$  value is **0.0014**

#### **Quenching constant for PA ( $K_{sv_{PA}}$ )**

The calculated Stern-Volmer equation for the PA given above is:

$$y = 0.00135x + 0.950$$

so the calculated  $K_{sv_{2,4-DNPH}}$  value is **0.00135**

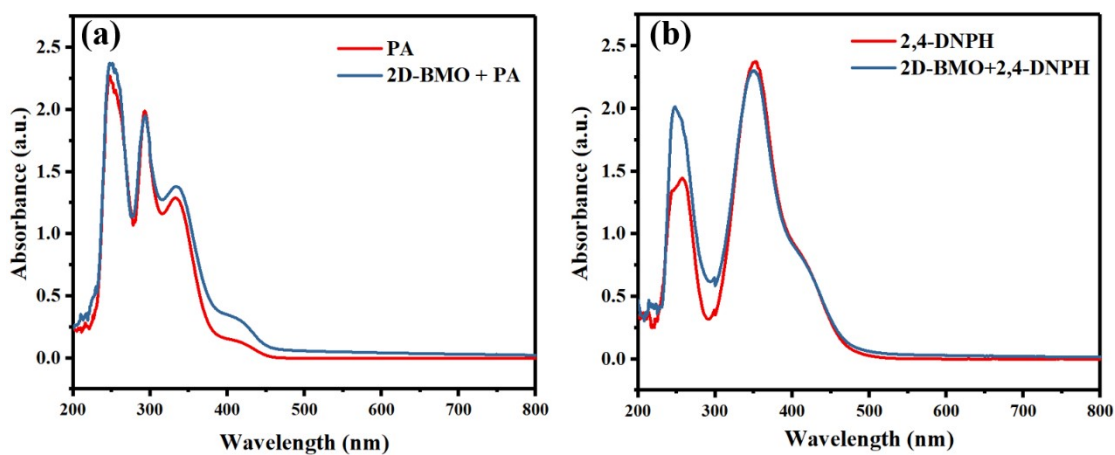

**Fig. S4** (a) PA, and PA with the 2D-BMO nanosheets, (b) 2,4-DNPH, and 2,4-DNPH with the 2D-BMO nanosheets UV-visible absorption spectra

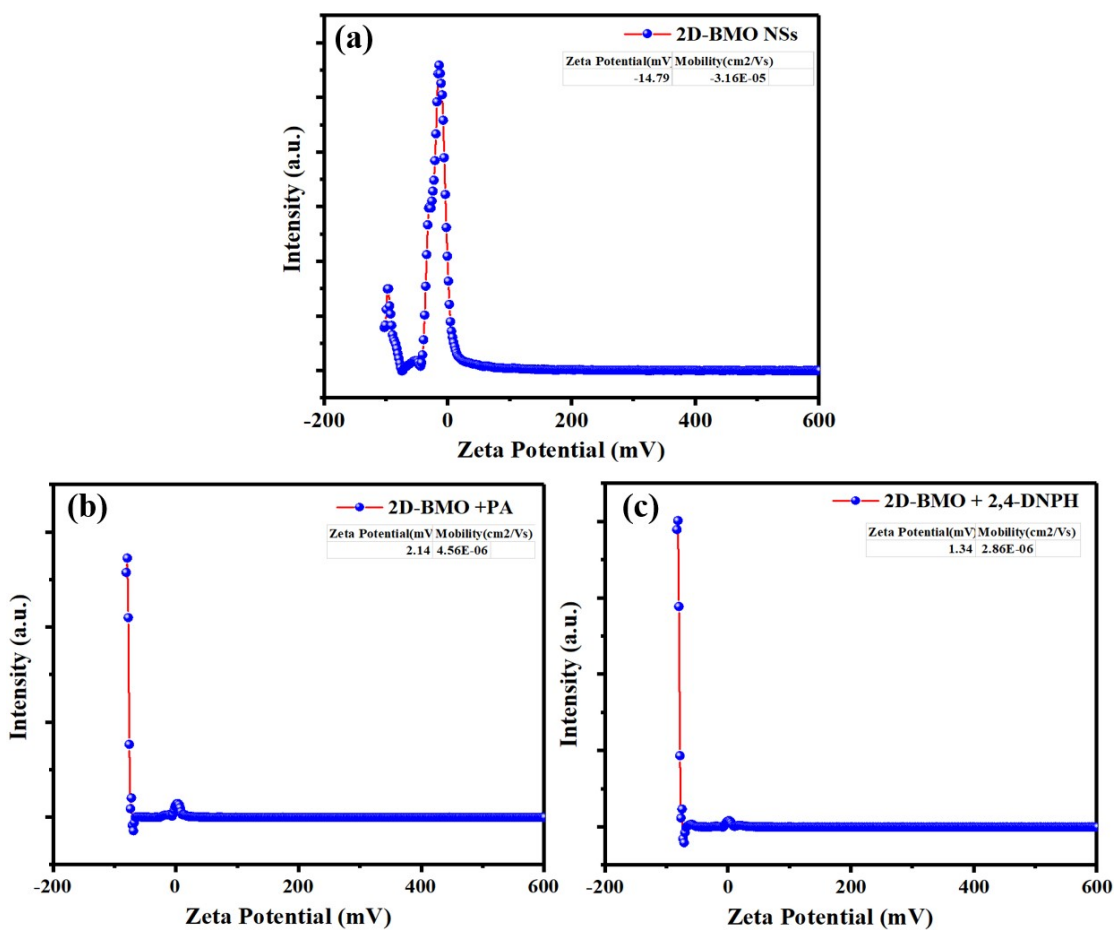

**Fig. S5** (a-c) Zeta potential of 2D-BMO nanosheets, 2D-BMO nanosheets with the PA, and 2D-BMO nanosheets with the 2,4-DNPH respectively.

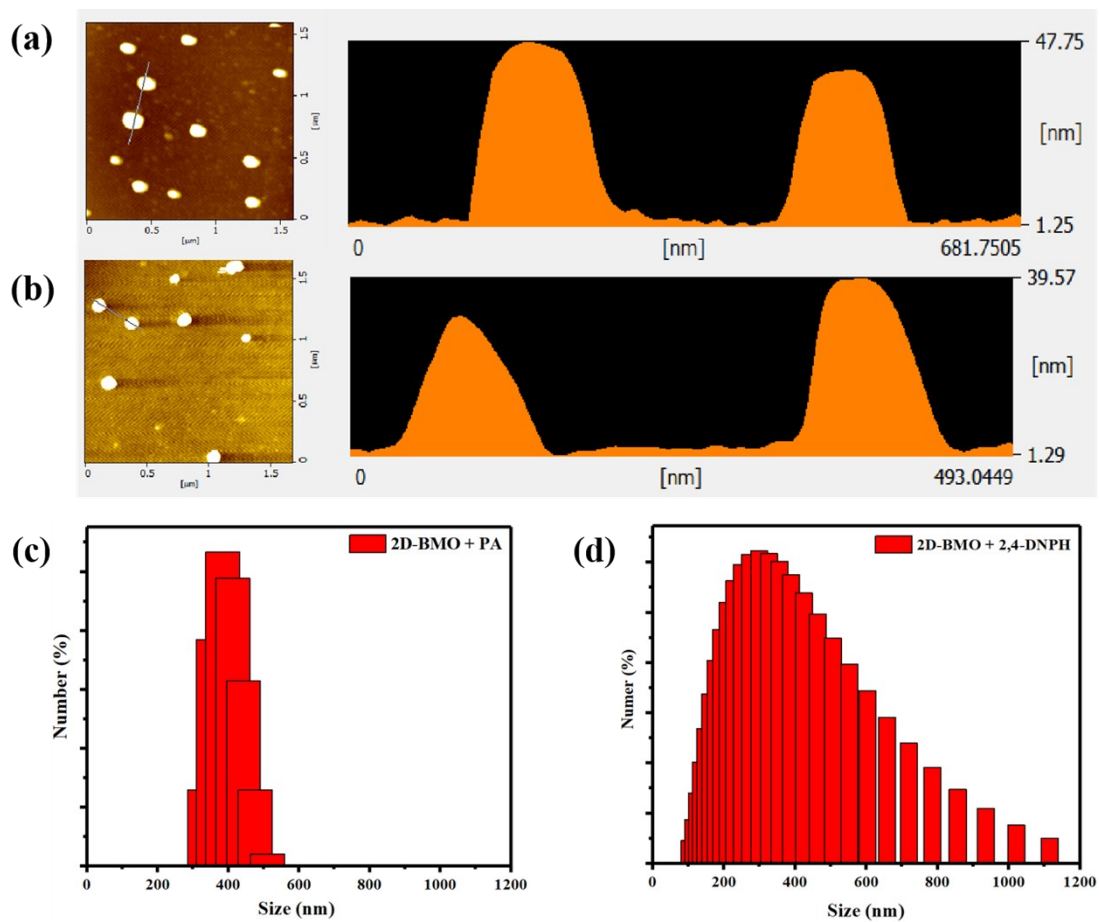

**Fig. S6** (a,b) AFM topography and height profile, (c,d) DLS size of 2D-BMO with the PA and 2D-BMO with the 2,4-DNPH respectively.

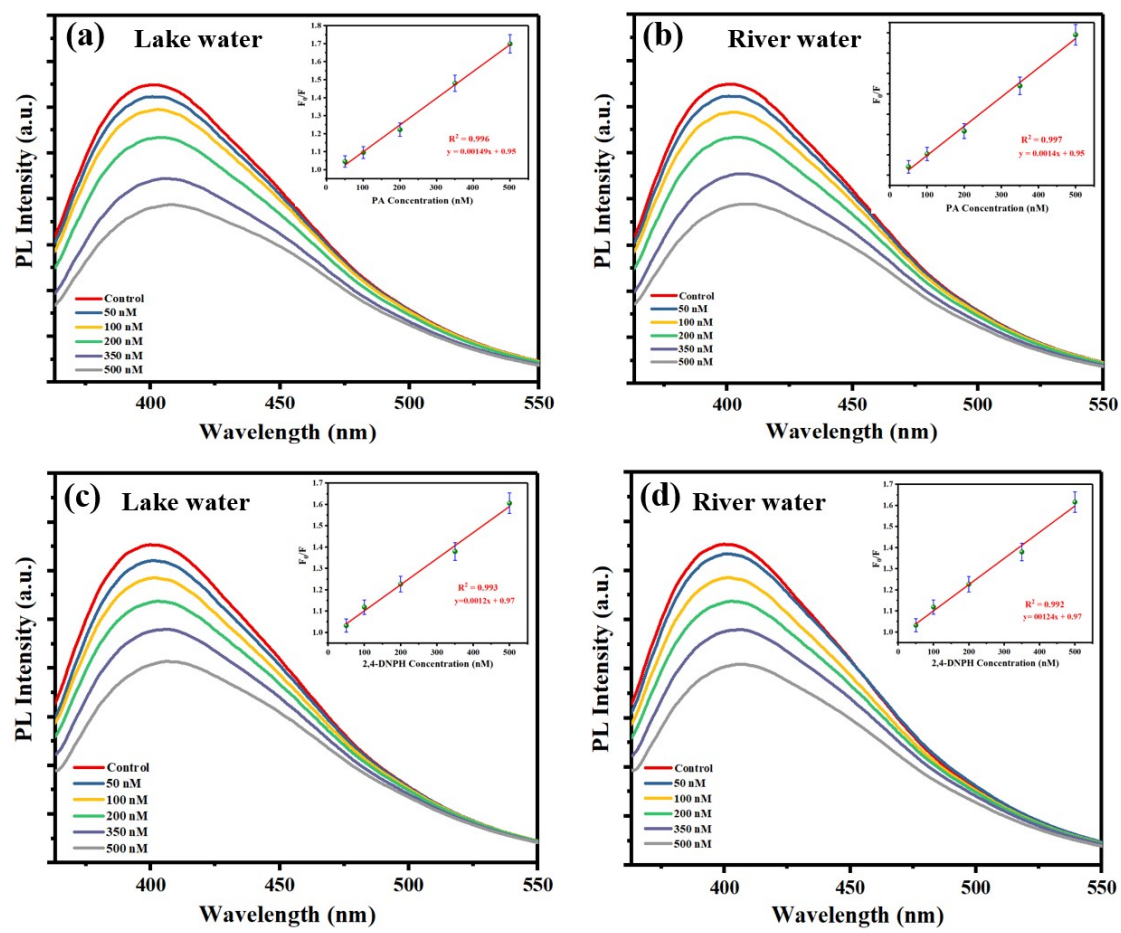

**Fig. S7** Real sample studies of PA in (a) lake water, and (b) river water. Real sample studies of 2,4-DNPH in (c) lake water, and (d) river water.



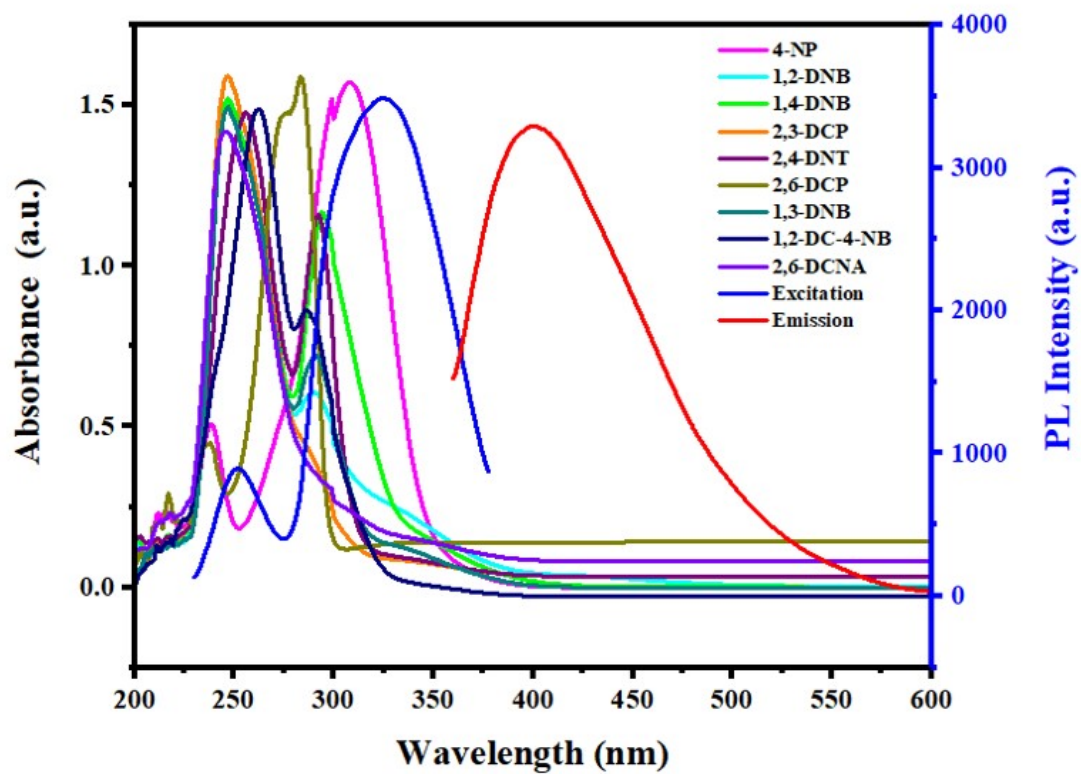

**Fig. S8** Absorption spectra of nitroaromatic and excitation and emission spectra of the 2D-BMO nanosheets

**Table S1.** Comparison of different chemosensors with 2D-BMO nanosheets from literature for the detection of PA and 2,4-DNPH

| <b>Material</b>                  | <b>Method</b>   | <b>Nitroaromatic compound</b> | <b>LOD</b>            | <b>References</b> |
|----------------------------------|-----------------|-------------------------------|-----------------------|-------------------|
| Zn-MOF                           | Fluorescence    | 2,4-DNPH<br>PA                | 100 nM<br>500nM       | 2                 |
| BODIPY derivatives               | Fluorescence    | 2,4-DNPH                      | 1.06 $\mu$ M          | 4                 |
| p-PABA-MnO <sub>2</sub>          | Electrochemical | 2,4-DNPH                      | 0.08 $\mu$ M          | 5                 |
| CdTe QDs                         | Fluorescence    | 2,4-DNPH                      | 0.23 ng/mL            | 6                 |
| Thiobarbituric acid based        | HPLC-UV         | 2,4-DNPH                      | 0.25 ng/ml            |                   |
| 2D ONs                           | Fluorescence    | 2,4-DNPH                      | 0.1 $\mu$ M           | 3                 |
| Carbon nanoparticles             | Fluorescence    | PA                            | 0.25 $\mu$ M          | 7                 |
| NCDs Malic acid and Urea         | Fluorescence    | PA                            | 33 nM                 | 8                 |
| palladium-based macro-cycles     | Fluorescence    | PA                            | 0.2 $\mu$ M           | 9                 |
| PFAM                             | Fluorescence    | PA                            | 57.8 nM               | 10                |
| Phen-SnO <sub>2</sub> Nanosheets | Fluorescence    | PA                            | 0.011 $\mu$ M (11 nm) | 11                |
| 2D-BMO nanosheets                | Fluorescence    | 2,4-DNPH<br>PA                | 2.30 nM<br>2.21 nM    | <b>This work</b>  |

## References

- 1 D.Dabur, P.Rana and H.-F.Wu, *ACS Appl. Mater. Interfaces*.
- 2 E.Zhang, P.Ju, Z.Zhang, H.Yang, L.Tang, X.Hou, J.You and J.Wang, *Spectrochim. Acta Part A Mol. Biomol. Spectrosc.*, 2019, **222**, 117207.
- 3 D.Dabur, Y. C.Chiu and H.-F.Wu, *J. Ind. Eng. Chem.*
- 4 D.Wang, L.Marin and X.Cheng, *New J. Chem.*, 2022, **46**, 20699–20710.
- 5 W. A.Adeosun, A. M.Asiri and H. M.Marwani, *Ecotoxicol. Environ. Saf.*, 2020, **206**, 111171.
- 6 Q.Wang, X.Wang and Y.Wu, *Photochem. Photobiol.*, 2019, **95**, 895–900.
- 7 X.Sun, J.He, Y.Meng, L.Zhang, S.Zhang, X.Ma, S.Dey, J.Zhao and Y.Lei, *J. Mater. Chem. A*, 2016, **4**, 4161–4171.
- 8 M. K.Mahto, D.Samanta, M.Shaw, M. A. S.Shaik, R.Basu, I.Mondal, A.Bhattacharya and A.Pathak, *ACS Appl. Nano Mater.*, 2023, **6**, 8059–8070.
- 9 S.Kumar, R.Kishan, P.Kumar, S.Pachisia and R.Gupta, *Inorg. Chem.*, 2018, **57**, 1693–1697.
- 10 A. S.Tanwar, S.Hussain, A. H.Malik, M. A.Afroz and P. K.Iyer, *Acs Sensors*, 2016, **1**, 1070–1077.
- 11 D.Dabur, Y.-T.Chan and H.-F.Wu, *Environ. Sci. Nano*, 2023, **10**, 3208–3219.
